# Supplementary material
Source: PubMed Central journal article supplement (PMC4833196)
Supplement: mmc1.pdf [file mmc1.pdf]

**The American Journal of Human Genetics, Volume 98**

**Supplemental Data**

**Recessive Inactivating Mutations in *TBCK*,  
Encoding a Rab GTPase-Activating Protein,  
Cause Severe Infantile Syndromic Encephalopathy**

**Jessica X. Chong, Viviana Caputo, Ian G. Phelps, Lorenzo Stella, Lisa Worgan, Jennifer C. Dempsey, Alina Nguyen, Vincenzo Leuzzi, Richard Webster, Antonio Pizzuti, Colby T. Marvin, Gisele E. Ishak, Simone Ardern-Holmes, Zara Richmond, Michael J. Bamshad, Xilma R. Ortiz-Gonzalez, Marco Tartaglia, Maya Chopra, Dan Doherty, and University of Washington Center for Mendelian Genomics**

**Table S1. Candidate genes in each family.**

|                               | Candidate gene      | Genomic coordinates (hg19) | Zyg         | ID          | Predicted amino acid change | CADD phred score | GeneDistiller score |
|-------------------------------|---------------------|----------------------------|-------------|-------------|-----------------------------|------------------|---------------------|
| <b>Fam A-II-1</b>             | <i>TBCK</i>         | chr4:107183260 G>A         | Hom         | -           | p.Arg126*                   | 37               | n/a                 |
|                               | <i>PRDM2</i>        | chr1:14109023 C>T          | Het         | rs148083107 | p.1578Leu                   | 25.2             | n/a                 |
|                               | <i>PRDM2</i>        | chr1:14149672 A>G          | Het         | rs202013308 | p.Asn225Ser                 | 16.64            | n/a                 |
|                               | <i>CGN</i>          | chr1:151491318 T>G         | Het         | rs142903144 | p.Val108Gly                 | 13.55            | n/a                 |
|                               | <i>CGN</i>          | chr1:151502430 C>T         | Het         | rs147054552 | p.Arg718Trp                 | 21               | n/a                 |
|                               | <i>TTN</i>          | chr2:179397433 G>A         | Het         | rs200716930 | p.Arg34637Trp               | 24.8             | n/a                 |
|                               | <i>TTN</i>          | chr2:179457531 G>A         | Het         | rs72646840  | p.Pro19772Leu               | 21.1             | n/a                 |
|                               | <i>DUSP19</i>       | chr2:183943771 A>G         | Het         | -           | p.Asp37Gly                  | 15.85            | n/a                 |
|                               | <i>DUSP19</i>       | chr2:183943783 A>G         | Het         | rs75674163  | p.His41Arg                  | 10.16            | n/a                 |
|                               | <i>DDX4</i>         | chr5:55075860 G>A          | Het         | rs147190735 | p.Gly155Ser                 | 23               | n/a                 |
|                               | <i>DDX4</i>         | chr5:55076956 C>A          | Het         | rs148485105 | p.Pro187Thr                 | 4.742            | n/a                 |
|                               | <i>MACC1</i>        | chr7:20199461 G>A          | Het         | rs200826339 | p.Arg175Trp                 | 28.5             | n/a                 |
|                               | <i>MACC1</i>        | chr7:20201458 G>A          | Het         | rs117142233 | p.Arg108Trp                 | 14.58            | n/a                 |
|                               | <i>DNAH11</i>       | chr7:21640660 G>A          | Het         | -           | p.Met1096Ile                | 7.93             | n/a                 |
|                               | <i>DNAH11</i>       | chr7:21641142 C>G          | Het         | -           | p.Ala1185Gly                | 21.6             | n/a                 |
|                               | <i>SLC7A13</i>      | chr8:87229732 T>G          | Het         | rs140915018 | p.Arg382Ser                 | 23.8             | n/a                 |
|                               | <i>SLC7A13</i>      | chr8:87241843 C>T          | Het         | rs148729888 | p.Ala222Thr                 | 8.719            | n/a                 |
|                               | <i>MRGPRG</i>       | chr11:3239259 G>A          | Het         | -           | p.Pro262Leu                 | 18.03            | n/a                 |
|                               | <i>MRGPRG</i>       | chr11:3239398 A>T          | Het         | -           | p.Phe216Ile                 | 0.002            | n/a                 |
|                               | <i>OR52W1</i>       | chr11:6221376 G>A          | Hom         | rs149476132 | p.Arg308Gln                 | 3.529            | n/a                 |
|                               | <i>SLCO1B3</i>      | chr12:21015348 T>G         | Het         | rs140353351 | p.Cys162Gly                 | 21.8             | n/a                 |
|                               | <i>SLCO1B3</i>      | chr12:21015737 C>G         | Het         | rs115227445 | p.Leu226Val                 | 12.22            | n/a                 |
|                               | <i>OTOGL</i>        | chr12:80651708 G>T         | Het         | rs192234924 | p.Gln596His                 | 25.6             | n/a                 |
|                               | <i>OTOGL</i>        | chr12:80712366 G>C         | Het         | rs139375212 | p.Gln1216His                | 12.7             | n/a                 |
|                               | <i>ZC3H13</i>       | chr13:46538115 G>A         | Het         | -           | p.Arg1513*                  | 39               | n/a                 |
|                               | <i>ZC3H13</i>       | chr13:46541962 C>T         | Het         | rs75503329  | p.Arg1333His                | 23.9             | n/a                 |
|                               | <i>ZNF469</i>       | chr16:88500657 A>G         | Het         | rs75136873  | p.Lys2232Arg                | 0.002            | n/a                 |
|                               | <i>ZNF469</i>       | chr16:88502882 A>C         | Hom         | rs141776185 | p.Met2974Leu                | 0.025            | n/a                 |
|                               | <i>C19orf21</i>     | chr19:757509 G>C           | Het         | rs78455638  | p.Arg188Thr                 | 0.001            | n/a                 |
|                               | <i>C19orf21</i>     | chr19:757641 A>G           | Het         | rs3746175   | p.Lys232Arg                 | 0.001            | n/a                 |
|                               | <i>PPP6R1</i>       | chr19:55742803 G>A         | Het         | rs200736594 | p.Arg812Cys                 | 12.56            | n/a                 |
|                               | <i>PPP6R1</i>       | chr19:55751610 C>T         | Het         | rs201089630 | p.Arg452His                 | 15.89            | n/a                 |
|                               | <i>DNAJC28</i>      | chr21:34861335 ATCTTCT>A   | Hom         | -           | p.Glu120_Glu121del          | 16.62            | n/a                 |
|                               | <i>DNAJC28</i>      | chr21:34861444 G>A         | Hom         | rs144266803 | p.Thr86Ile                  | 15.77            | n/a                 |
|                               | <i>GART</i>         | chr21:34889888 A>G         | Hom         | rs151206034 | p.Met577Thr                 | 19.71            | n/a                 |
|                               | <i>GART</i>         | chr21:34897281 G>C         | Hom         | rs139633075 | p.Leu365Val                 | 14.62            | n/a                 |
|                               | <i>GART</i>         | chr21:34903861 C>A         | Hom         | rs142038738 | p.Glu177Asp                 | 8.326            | n/a                 |
|                               | <i>SON</i>          | chr21:34925936 A>G         | Hom         | rs142751481 | p.Ile1467val                | 0.001            | n/a                 |
|                               | <i>DONSON</i>       | chr21:34951753 T>G         | Hom         | rs146664036 | p.Lys489Thr                 | 10.7             | n/a                 |
|                               | <i>DMD</i>          | chrX:31854852 C>T          | Hem         | rs72466590  | p.Ala3686Thr                | 15.64            | n/a                 |
|                               | <i>CXorf30</i>      | chrX:36337351 T>C          | Hem         | rs145065748 | p.Met237Thr                 | 0.002            | n/a                 |
|                               | <i>KDM5C</i>        | chrX:53222017 G>C          | Hem         | -           | p.Pro1350Arg                | 2.121            | n/a                 |
| <i>FAM104B</i>                | chrX:55170246 T>C   | Hem                        | rs182883175 | p.Asn106Ser | 0.627                       | n/a              |                     |
| <i>ACRC</i>                   | chrX:70832746 C>T   | Hem                        | rs138927483 | p.Arg664Cys | 17.56                       | n/a              |                     |
| <i>SLC16A2</i>                | chrX:73744567 C>T   | Hem                        | rs144755294 | p.Arg317Cys | 33                          | n/a              |                     |
| <i>MAGEE1</i>                 | chrX:75649404 G>A   | Hem                        | rs145927168 | p.Gly361Ser | 10.64                       | n/a              |                     |
| <i>ARMCX2</i>                 | chrX:100911031 C>T  | Hem                        | rs192734301 | p.Arg515Cys | 25.5                        | n/a              |                     |
| <i>MAGEC3</i>                 | chrX:140985243 G>T  | Hem                        | rs143730187 | p.Val567Phe | 11.39                       | n/a              |                     |
| <b>Fam B-IV-4</b>             | <i>TBCK</i>         | chr4:107156512 T>A         | Hom         | rs376699648 | p.Lys455*                   | 42.0             | n/a                 |
| <b>Fam B-IV-6</b>             | <i>VPS50</i>        | chr7:92953034 G>A          | Hom         | -           | p.Arg626Gln                 | 22.1             | n/a                 |
|                               | <i>LRCH4</i>        | chr7:100173865 C>T         | Hom         | rs370008127 | p.Arg545His                 | 22.7             | n/a                 |
| <b>Fam C-II-1<sup>1</sup></b> | <i>TBCK</i>         | chr4:107154202, C>T        | Hom         | -           | p.Arg511His                 | 35.0             | 17.0                |
|                               | <i>TRPM4</i>        | chr19:49685865, G>A        | Hom         | rs201907325 | p.Ala432Thr                 | 33.0             | 10.6                |
|                               |                     | chr19:49691898, G>A        | Hom         | rs172149856 | p.Gly582Ser                 | 20.3             |                     |
|                               | <i>HAUS3</i>        | chr4:2238026, G>C          | Hom         | -           | p.Arg503Gly                 | 23.9             | 8.9                 |
|                               | <i>ARHGFE28</i>     | chr5:73128166, G>A         | Hom         | rs187897891 | p.Arg343His                 | 21.4             | 6.9                 |
|                               | <i>CMBL</i>         | chr5:10290679, TC>T        | Hom         | -           | frameshift                  | 35.0             | 6.0                 |
|                               | <i>TMEM131</i>      | chr2:98612283, G>A         | Hom         | -           | start gain                  | 15.2             | 4.2                 |
|                               | <i>EYS</i>          | chr6:64791875, A>G         | Hom         | -           | p.Ser2149Pro                | 24.7             | 1.0                 |
| <i>KCTD14</i>                 | chr11:77728003, C>T | Hom                        | -           | p.Arg135Gln | 34.0                        | -0.3             |                     |

<sup>1</sup>Based on the hypothesis of homozygosity by descent, 16 candidate genes with private or rare (MAF <0.001), homozygous variants were identified. Genes were ranked taking into account their predicted biological relevance on the developmental processes altered in the disorder (GeneDistiller; using the following keywords: brain atrophy, optic atrophy, corpus callosum, cerebellum, hypotonia and dysphagia). Only genes with variants predicted to have damaging impact (CADD\_phred > 15) were retained.

**Table S2. Diagnostic evaluations of patients with *TBCK*-related encephalopathy.**

|                          | <b>Family A-II-1</b>                                                                                  | <b>Family B-IV-4</b>                                                              | <b>Family B-IV-6</b>                                                                              | <b>Family C-II-1</b>                                                                                                                                        | <b>Family D-II-1</b>                                                                                                                                                                                                                    |
|--------------------------|-------------------------------------------------------------------------------------------------------|-----------------------------------------------------------------------------------|---------------------------------------------------------------------------------------------------|-------------------------------------------------------------------------------------------------------------------------------------------------------------|-----------------------------------------------------------------------------------------------------------------------------------------------------------------------------------------------------------------------------------------|
| EMG/nerve conduction     | normal at 2 yr                                                                                        | axonal neuropathy                                                                 | axonal neuropathy                                                                                 | Normal at 2 yr                                                                                                                                              | At 8mo: Nerve conduction studies normal, EMG with possible myopathic changes                                                                                                                                                            |
| EEG                      | slow, disorganized, multifocal sharps, maximal R frontal                                              | slowing, paroxysmal fast activity, bifrontal spikes, no normal sleep architecture | diffuse fast activity, generalized paroxysmal fast activity, spikes, no normal sleep architecture | slow and high-voltage monomorphic and diffuse high-voltage slow (delta) activity, paroxysmal high-voltage burst of spikes in left temporal/occipital region | mixed focal and generalized seizures                                                                                                                                                                                                    |
| Lactate                  | elevated only when severe illness; elevated in urine OA                                               | Normal                                                                            | Normal                                                                                            | Normal                                                                                                                                                      | Normal                                                                                                                                                                                                                                  |
| Creatine kinase          | Unknown                                                                                               | Normal                                                                            | Unknown                                                                                           | Unknown                                                                                                                                                     | Normal                                                                                                                                                                                                                                  |
| Plasma amino acids       | incr glutamine                                                                                        | Normal                                                                            | Unk, CSF aa normal                                                                                | Normal                                                                                                                                                      | Normal                                                                                                                                                                                                                                  |
| Urine organic acids      | incr lactate                                                                                          | Unknown                                                                           | Unknown                                                                                           | Normal                                                                                                                                                      | Normal                                                                                                                                                                                                                                  |
| Biopsies                 | Muscle: rare scattered small fibers<br><br>Liver: panlobular hepatocellular ballooning                | Unknown                                                                           | Nerve: chronic axonal degeneration                                                                | Not done                                                                                                                                                    | Muscle: angiocentric perimysial lymphocytic infiltrates, no overt myopathic changes, dispersed moderately atrophic fibers, type II predominance<br><br>Nerve: patchy loss of large caliber axons and moderately swollen axonal profiles |
| Respiratory chain assays | Muscle: Complex IV (COX) activity 37%, mildly low complex II and I<br><br>Fibroblasts: NI PC, CS, PDH | Pending                                                                           | low respiratory chain enzyme levels, non-diagnostic                                               | Not done                                                                                                                                                    | Muscle: low complex I&III activity (30-40% of control)                                                                                                                                                                                  |

|                 |                                                                                                                                                    |                  |                              |                                      |    |
|-----------------|----------------------------------------------------------------------------------------------------------------------------------------------------|------------------|------------------------------|--------------------------------------|----|
| Genetic testing | NI MitoMet,<br>oligonucleotide array,<br>Nuclear complex IV<br>gene sequencing<br>( <i>SCO1</i> , <i>SCO2</i> ,<br><i>SURF1</i> and <i>COX10</i> ) | Normal CGH array | CGH array (1.2 Mb)<br>normal | CGH array: pat del11p15.4<br>(81 Kb) | NA |
|-----------------|----------------------------------------------------------------------------------------------------------------------------------------------------|------------------|------------------------------|--------------------------------------|----|

---

CGH: comparative genomic hybridization, CS: citrate synthase, incr: increased, Kb; Kilobases, mo: months, NA: Not Available, OA: Organic Acids, pat: paternal, PC: pyruvate carboxylase, PDH: pyruvate dehydrogenase, yr: years

**Table S3. Brain imaging features of individuals with *TBCK* mutations.**

| Feature                                                    | Family A-II-1                                                                                                                 | Family B-IV-4                                     | Family B-IV-6                                            | Family C-II-1                                            | Family D-II-1       |
|------------------------------------------------------------|-------------------------------------------------------------------------------------------------------------------------------|---------------------------------------------------|----------------------------------------------------------|----------------------------------------------------------|---------------------|
| Age at MRI                                                 | 22 d, 18 mo, 2, 3, and 8 yr                                                                                                   | 18 mo                                             | 4 and 6 yr                                               | 21 mo                                                    | 14 yo               |
| Extra-axial space                                          | Incr                                                                                                                          | Incr                                              | Incr                                                     | Incr                                                     | Incr                |
| Ventriculomegaly                                           | Yes                                                                                                                           | Yes                                               | Yes                                                      | Yes                                                      | Mild                |
| Cortical gray and WM volume                                | Decr                                                                                                                          | Decr                                              | Decr                                                     | Decr                                                     | Decr                |
| Periventricular WM T2/FLAIR signal                         | Incr                                                                                                                          | Incr                                              | Incr                                                     | Incr                                                     | Incr                |
| CC thinning                                                | Yes                                                                                                                           | Yes                                               | Yes                                                      | Yes                                                      | Yes                 |
| CC partial agenesis                                        | Yes                                                                                                                           | No                                                | No                                                       | Yes                                                      | No                  |
| Basal ganglia                                              | Small                                                                                                                         | Small                                             | Small                                                    | Small                                                    | Small               |
| Cerebellar hypoplasia<br>(vermis smaller than hemispheres) | Yes                                                                                                                           | Yes                                               | Yes                                                      | Yes                                                      | Yes                 |
| Relatively spared brainstem                                | Yes                                                                                                                           | Yes                                               | Yes                                                      | No                                                       | Yes                 |
| Magnetic resonance spectroscopy                            | Normal except for decr<br>NAA c/w atrophy, no lactate                                                                         | NA                                                | Normal except for<br>decr NAA c/w<br>atrophy, no lactate | Normal except for<br>decr NAA c/w<br>atrophy, no lactate | NA                  |
| Other findings                                             | History of restricted<br>diffusion and edema of right<br>parietal-occipital cortex,<br>subdural hematoma, dural<br>thickening | turricephaly, right<br>posterior<br>plagiocephaly | synechia in right<br>frontal horn                        | brainstem atrophy<br>and dysplasia                       | thick frontal skull |

CC: Corpus Callosum, d: days, Decr: Decreased, Incr: Increased, mo: months, NA: Not Available, NAA: N-acetylaspartate, T2/FLAIR; FLuid-Attenuated Inversion Recovery, Unk: Unknown, WM: White Matter, yr: years
